# Supplementary material
Source: HighWire-hosted journal article supplement (https://bmjopen.bmj.com/content/10/11/e038786)
Supplement: inline-supplementary-material-2 [file inline-supplementary-material-2.pdf]

Supplementary Table 1 The relationships among demographic characteristics, sleep disorders and HCC level

| Variables        | Sleep Disorders        |                       | OR<br>(95%CI)       | <i>p</i> | Original<br>HCC<br>Median(Q <sub>1</sub> -<br>Q <sub>3</sub> )<br>(ng/g hair) | Original<br>HCC<br>GM±GSD<br>(ng/g hair) | <i>t</i> / <i>F</i> | Cohen's<br>d/<br>η <sup>2</sup> | <i>p</i> |
|------------------|------------------------|-----------------------|---------------------|----------|-------------------------------------------------------------------------------|------------------------------------------|---------------------|---------------------------------|----------|
|                  | Yes [n (%)]<br>(n=124) | No [n (%)]<br>(n=311) |                     |          |                                                                               |                                          |                     |                                 |          |
| <b>Gender</b>    |                        |                       |                     |          |                                                                               |                                          |                     |                                 |          |
| Male             | 40(24.39)              | 124(75.61)            | 1.00                | 0.140    | 3.33<br>(2.22-5.08)                                                           | 3.28±1.67                                | 0.836               | 0.086                           | 0.403    |
| Female           | 84(31.00)              | 187(69.00)            | 1.39<br>(0.90-2.16) |          | 3.05<br>(2.11-4.55)                                                           | 3.14±1.66                                |                     |                                 |          |
| <b>Age</b>       |                        |                       |                     |          |                                                                               |                                          |                     |                                 |          |
| <30              | 19(29.23)              | 46(70.77)             | 1.00                | 0.603    | 3.41<br>(2.42-4.49)                                                           | 3.36±1.61                                | 1.134               | 0.005                           | 0.323    |
| 30-              | 40(25.64)              | 116(74.36)            | 0.84<br>(0.44-1.59) |          | 2.95<br>(2.10-4.88)                                                           | 3.05±1.66                                |                     |                                 |          |
| 40-              | 65(30.37)              | 149(69.63)            | 1.06<br>(0.58-1.94) |          | 3.24<br>(2.20-4.72)                                                           | 3.25±1.67                                |                     |                                 |          |
| <b>Ethnicity</b> |                        |                       |                     |          |                                                                               |                                          |                     |                                 |          |
| Han              | 95(27.70)              | 248(72.30)            | 1.00                | 0.718    | 3.17<br>(2.10-4.73)                                                           | 3.16±1.67                                | 0.704               | 0.003                           | 0.495    |
| Uyghur           | 14(29.79)              | 33(70.21)             | 1.11<br>(0.57-2.16) |          | 3.28<br>(2.28-4.06)                                                           | 3.24±1.63                                |                     |                                 |          |
| Others           | 15(33.33)              | 30(66.67)             | 1.30<br>(0.67-2.53) |          | 3.63<br>(2.56-4.84)                                                           | 3.47±1.60                                |                     |                                 |          |

| <b>Education</b>                          |           |            |                     |       |                     |           |       |       |       |
|-------------------------------------------|-----------|------------|---------------------|-------|---------------------|-----------|-------|-------|-------|
| High school and below                     | 33(32.67) | 68(67.33)  | 1.00                |       | 3.58<br>(2.26-4.86) | 3.33±1.71 |       |       |       |
| Junior college                            | 72(26.09) | 204(73.91) | 0.73<br>(0.44-1.19) | 0.340 | 3.12<br>(2.13-4.67) | 3.15±1.64 | 0.467 | 0.002 | 0.627 |
| Bachelor degree and above                 | 19(32.76) | 39(67.24)  | 1.00<br>(0.50-2.00) |       | 3.18<br>(2.33-4.19) | 3.18±1.65 |       |       |       |
| <b>Marital status</b>                     |           |            |                     |       |                     |           |       |       |       |
| Spinsterhood                              | 13(24.53) | 40(75.47)  | 1.00                |       | 3.41<br>(2.42-5.18) | 3.41±1.63 |       |       |       |
| Married                                   | 95(29.50) | 227(70.50) | 1.29<br>(0.66-2.52) | 0.716 | 3.19<br>(2.16-4.63) | 3.21±1.65 | 1.450 | 0.007 | 0.236 |
| Others<br>(divorce, widow and<br>remarry) | 16(26.67) | 44(73.33)  | 1.12<br>(0.48-2.61) |       | 3.35<br>(1.87-4.71) | 2.92±1.72 |       |       |       |
| <b>Monthly income(yuan)</b>               |           |            |                     |       |                     |           |       |       |       |
| <3000                                     | 30(32.26) | 63(67.74)  | 1.00                |       | 3.20<br>(2.20-5.06) | 3.27±1.69 |       |       |       |
| 3000-5000                                 | 87(27.62) | 228(72.38) | 0.80<br>(0.49-1.32) | 0.653 | 3.16<br>(2.14-4.55) | 3.14±1.64 | 0.846 | 0.004 | 0.430 |
| ≥5000                                     | 7(25.93)  | 20(74.07)  | 0.74<br>(0.28-1.93) |       | 3.64<br>(2.21-5.32) | 3.54±1.73 |       |       |       |
| <b>Physical exercise</b>                  |           |            |                     |       |                     |           |       |       |       |
| Never                                     | 30(30.00) | 70(70.00)  | 1.00                | 0.453 | 3.52<br>(2.06-4.94) | 3.24±1.68 | 0.794 | 0.005 | 0.497 |
| <3 times/week                             | 34(23.78) | 109(76.22) | 0.99                |       | 2.94                | 3.03±1.64 |       |       |       |

|                                  |           |            |                     |       |                     |           |        |        |       |
|----------------------------------|-----------|------------|---------------------|-------|---------------------|-----------|--------|--------|-------|
|                                  |           |            | (0.56-1.72)         |       | (2.10-4.24)         |           |        |        |       |
| ≥3 times/week                    | 17(34.00) | 33(66.00)  | 0.72<br>(0.42-1.22) |       | 3.37<br>(2.38-5.41) | 3.35±1.68 |        |        |       |
| Irregular                        | 43(30.28) | 99(69.72)  | 1.19<br>(0.60-2.36) |       | 3.24<br>(2.28-4.83) | 3.27±1.68 |        |        |       |
| <b>Smoking status</b>            |           |            |                     |       |                     |           |        |        |       |
| Frequently                       | 19(22.89) | 64(77.11)  | 1.00                |       | 3.16<br>(2.11-4.96) | 3.14±1.66 |        |        |       |
| Occasionally                     | 13(24.53) | 40(75.47)  | 1.10<br>(0.49-2.46) | 0.469 | 3.28<br>(2.25-4.81) | 3.21±1.66 | 0.039  | <0.001 | 0.990 |
| Quitted                          | 7(28.00)  | 18(72.00)  | 1.31<br>(0.48-3.60) |       | 2.83<br>(2.14-5.17) | 3.20±1.78 |        |        |       |
| Never                            | 85(31.02) | 189(68.98) | 1.52<br>(0.86-2.68) |       | 3.19<br>(2.15-4.62) | 3.21±1.66 |        |        |       |
| <b>Alcohol consumption</b>       |           |            |                     |       |                     |           |        |        |       |
| Frequently                       | 8(24.24)  | 25(75.76)  | 1.00                |       | 3.21<br>(2.18-5.08) | 3.18±1.70 |        |        |       |
| Occasionally                     | 49(29.34) | 118(70.66) | 1.30<br>(0.55-3.08) | 0.821 | 3.34<br>(2.29-5.06) | 3.28±1.66 | 0.312  | 0.002  | 0.817 |
| Quitted                          | 5(21.74)  | 18(78.26)  | 0.87<br>(0.24-3.09) |       | 2.82<br>(2.14-5.15) | 3.03±1.79 |        |        |       |
| Never                            | 62(29.25) | 150(70.75) | 1.29<br>(0.55-3.03) |       | 3.15<br>(2.10-4.49) | 3.15±1.64 |        |        |       |
| <b>Length of service (years)</b> |           |            |                     |       |                     |           |        |        |       |
| <20                              | 61(26.29) | 171(73.71) | 1.00                | 0.445 | 3.11<br>(2.12-4.82) | 3.13±1.66 | -0.784 | 0.077  | 0.433 |

|                     |           |            |                     |       |                     |           |       |       |       |
|---------------------|-----------|------------|---------------------|-------|---------------------|-----------|-------|-------|-------|
| ≥20                 | 63(31.03) | 140(68.97) | 1.26<br>(0.83-1.91) |       | 3.28<br>(2.21-4.68) | 3.26±1.66 |       |       |       |
| <b>Type of work</b> |           |            |                     |       |                     |           |       |       |       |
| Oil transportation  | 67(25.48) | 196(74.52) | 1.00                |       | 3.17<br>(2.10-4.66) | 3.13±1.66 |       |       |       |
| Oil extraction      | 4(23.53)  | 13(76.47)  | 0.90<br>(0.28-2.86) | 0.162 | 2.85<br>(2.15-4.85) | 3.03±1.84 | 0.583 | 0.004 | 0.626 |
| Refinery            | 19(29.23) | 46(70.77)  | 1.21<br>(0.66-2.21) |       | 3.53<br>(2.18-5.16) | 3.37±1.70 |       |       |       |
| Others              | 34(37.78) | 56(62.22)  | 1.78<br>(1.07-2.95) |       | 3.33<br>(2.43-4.34) | 3.30±1.62 |       |       |       |

**Yes: workers with sleep disorders; No: workers without sleep disorders; %: prevalence of sleep disorders at each row; t/F: values calculated by student *t***

**tests or variance analyses used transformed HCC; Cohen'd/η<sup>2</sup>: effect sizes of *t* tests and variance analyses**
